# Supplementary material for: Modeling Silicon-Dominant Anodes: Parametrization, Discussion, and Validation of a Newman-Type Model
Source: MDPI journal article supplement (doi:10.3390/batteries9110558), 2023-11-15
Supplement: s1 [file s1]

Archive with 1 entries (1 files):
- batteries-2696710-supplementary.pdf
